# Supplementary material for: Molecular Signatures of Quiescent, Mobilized and Leukemia-Initiating Hematopoietic Stem Cells
Source: PLoS One. 2010 Jan 20;5(1):e8785. doi: 10.1371/journal.pone.0008785 (PMC2808351; doi:10.1371/journal.pone.0008785)
Supplement: Table S4 — Array features upregulated in HSC from the BM of JunB-deficient mice (LSC) compared to HSC from wt mice. (0.02 MB XLS) [file pone.0008785.s004.xls]

## Sheet: CML
CloneID	Symbol	Name	Chromosome	Location	MGI
1110018J19		neutrophil elastase	10	10 43.0 cM
1190014A08	Tcrb-V13	T-cell receptor beta, variable 13	6	6 20.5 cM	MGI:98587
1110038E07	C3	complement component 3	17	17 34.3 cM	MGI:88227
H3083G02	Lcn2	lipocalin 2	2	2 27.0 cM	MGI:96757
IMAGE:634970	Ccl9	chemokine (C-C motif) ligand 9	11	11 47.4 cM	MGI:104533
1110069K24	Cst7	cystatin F (leukocystatin)	2		MGI:1298217
2500003G08	Plac8	placenta-specific 8	5	5 54.0 cM	MGI:2445289
2810407G08	9030408N13Rik	RIKEN cDNA 9030408N13 gene	3		MGI:1914065
H3080E11	Ap3s1	adaptor-related protein complex 3, sigma 1 subunit	18		MGI:1337062
H3092G05	Anxa3	annexin A3	5	5 54.0 cM	MGI:1201378
1110067K07	Cpa3	carboxypeptidase A3, mast cell	3	3 13.2 cM	MGI:88479
1700013H13	Anxa3	annexin A3	5	5 54.0 cM	MGI:1201378
CLONE IDENTITY UNKNOWN 22F10
H3060F11	Cybb	cytochrome b-245, beta polypeptide	X	X 2.8 cM	MGI:88574
1810038A22	Gna14	guanine nucleotide binding protein, alpha 14	19	19 9.0 cM	MGI:95769
CLONE IDENTITY UNKNOWN 21D2
2310007E11	Palm	paralemmin	10	10 43.0 cM	MGI:1261814
1190005K09	Ngp	neutrophilic granule protein	9		MGI:105983
1810008C09	Plac8	placenta-specific 8	5	5 54.0 cM	MGI:2445289
H3009D05	Lgals1	lectin, galactose binding, soluble 1	15	15 44.9 cM	MGI:96777
1810062G16	Igl-V1	immunoglobulin lambda chain, variable 1	16	16 13.0 cM	MGI:96530
1190001A16	Dtx4	deltex 4 homolog (Drosophila)	19		MGI:2672905
IMAGE:2192896	Cybb	cytochrome b-245, beta polypeptide	X	X 2.8 cM	MGI:88574
MNCb-5435	Eif4g2	eukaryotic translation initiation factor 4, gamma 2	7	7 51.52 cM	MGI:109207
H3107E11	Hdc	histidine decarboxylase	2	2 71.0 cM	MGI:96062
1600012B06	Ccl9	chemokine (C-C motif) ligand 9	11	11 47.4 cM	MGI:104533
