# Supplementary material for: Molecular Signatures of Quiescent, Mobilized and Leukemia-Initiating Hematopoietic Stem Cells
Source: PLoS One. 2010 Jan 20;5(1):e8785. doi: 10.1371/journal.pone.0008785 (PMC2808351; doi:10.1371/journal.pone.0008785)
Supplement: Table S5 — Genes enriched in normal, steady-state BM HSC from wt mice compared to MPP, LSC, and mobilized HSC. (0.05 MB XLS) [file pone.0008785.s005.xls]

## Sheet: Sheet1
Gene Symbol	Common Name	Entrez Gene ID	GeneSymbol	GO cellular component	GO molecular function	GO biological process
1700012H17Rik	RIKEN cDNA 1700012H17	242297	1700012H17Rik	GO:8372(cellular component unknown)	Unknown	Unknown
5730469M10Rik	RIKEN cDNA 5730469M10	70564	5730469M10Rik	Unknown	Unknown	Unknown
Aadacl1	arylacetamide deacetylase-like 1 (RIKEN cDNA B230106I24)	320024	B230106I24Rik		GO:3824(catalytic activity); GO:16787(hydrolase activity)	GO:8152(metabolism)
Adcy9	adenylate cyclase 9	11515	Adcy9	GO:16021(integral to membrane); GO:16020(membrane); GO:5886(plasma membrane)	GO:4016(adenylate cyclase activity); GO:16829(lyase activity); GO:287(magnesium ion binding); GO:46872(metal ion binding); GO:16849(phosphorus-oxygen lyase activity)	GO:7190(adenylate cyclase activation); GO:6171(cAMP biosynthesis); GO:9190(cyclic nucleotide biosynthesis); GO:7242(intracellular signaling cascade)
Akr1e1	aldo-keto reductase family 1, member E1	56043	Akr1e1	Unknown	GO:16491(oxidoreductase activity)	Unknown
Aldh1a7	aldehyde dehydrogenase family 1, subfamily A7	26358	Aldh1a7	Unknown	GO:4029(aldehyde dehydrogenase (NAD) activity); GO:16491(oxidoreductase activity)	GO:8152(metabolism); GO:42574(retinal metabolism)
Angpt1	angiopoietin 1	11600	Angpt1	GO:5615(extracellular space)	GO:5172(vascular endothelial growth factor receptor binding)	GO:1525(angiogenesis); GO:30154(cell differentiation); GO:7275(development); GO:7492(endoderm development); GO:7169(transmembrane receptor protein tyrosine kinase signaling pathway)
Anxa5	annexin A5	11747	Anxa5	Unknown	GO:5509(calcium ion binding); GO:5544(calcium-dependent phospholipid binding)	GO:7596(blood coagulation)
Ard1	N-acetyltransferase ARD1 homolog (S. cerevisiae)	56292	Ard1	GO:5737(cytoplasm)	GO:8080(N-acetyltransferase activity); GO:8415(acyltransferase activity); GO:4596(peptide alpha-N-acetyltransferase activity); GO:5515(protein binding); GO:16740(transferase activity)	GO:6323(DNA packaging); GO:7001(chromosome organization and biogenesis (sensu Eukaryota)); GO:6475(internal protein amino acid acetylation)
Arhgef12	Rho guanine nucleotide exchange factor (GEF) 12	69632	Arhgef12	GO:8372(cellular component unknown)	GO:5096(GTPase activator activity); GO:5085(guanyl-nucleotide exchange factor activity); GO:5515(protein binding)	GO:7242(intracellular signaling cascade)
Bex1	reduced expression 3	19716	Rex3	GO:5737(cytoplasm); GO:5634(nucleus)	GO:5515(protein binding)	cell differentiation, development, negative regulation of neuron differentiation, nerve growth factor receptor signaling pathway, nervous system development, positive regulation of neuroblast proliferation
Bgn	biglycan	12111	Bgn	GO:5578(extracellular matrix (sensu Metazoa)); GO:5615(extracellular space)	Unknown	Unknown
C130086A10	hypothetical protein C130086A10	208820	2310011G06Rik	Unknown	Unknown	Unknown
Cadps2	Ca2+-dependent activator protein for secretion 2	320405	Cadps2	GO:16023(cytoplasmic membrane-bound vesicle); GO:45211(postsynaptic membrane); GO:42734(presynaptic membrane); GO:8021(NOT synaptic vesicle)	GO:5515(protein binding)	GO:45921(positive regulation of exocytosis)
Car2	carbonic anhydrase 2	12349	Car2	Unknown	GO:4089(carbonate dehydratase activity); GO:16829(lyase activity); GO:46872(metal ion binding); GO:8270(zinc ion binding)	GO:6730(one-carbon compound metabolism)
Cdkn1c	cyclin-dependent kinase inhibitor 1C (P57)	12577	Cdkn1c	GO:5634(nucleus)	GO:4861(cyclin-dependent protein kinase inhibitor activity); GO:16301(kinase activity); GO:5515(protein binding); GO:4860(protein kinase inhibitor activity)	GO:7049(cell cycle); GO:7050(cell cycle arrest); GO:122(negative regulation of transcription from RNA polymerase II promoter); GO:42551(neuron maturation)
Cish	cytokine inducible SH2-containing protein	12700	Cish	GO:5886(plasma membrane)	GO:5515(protein binding)	GO:7242(intracellular signaling cascade); GO:9968(negative regulation of signal transduction); GO:7205(protein kinase C activation); GO:1558(regulation of cell growth)
Clstn1	calsyntenin 1	65945	Clstn1	GO:16021(integral to membrane); GO:16020(membrane); GO:45211(postsynaptic membrane)	GO:5509(calcium ion binding); GO:5515(protein binding)	GO:6874(calcium ion homeostasis); GO:7155(cell adhesion); GO:7156(homophilic cell adhesion)
Col4a2	procollagen, type IV, alpha 2	12827	Col4a2	GO:5604(basement membrane); GO:5581(collagen); GO:5587(collagen type IV); GO:5737(cytoplasm); GO:5578(extracellular matrix (sensu Metazoa)); GO:5615(extracellular space)	GO:5201(extracellular matrix structural constituent); GO:30020(extracellular matrix structural constituent conferring tensile strength); GO:5198(structural molecule activity)	GO:7155(cell adhesion); GO:6817(phosphate transport)
Creb3l2	cAMP responsive element binding protein 3-like 2	208647		GO:5634(nucleus)	DNA binding, protein dimerization activity, sequence-specific DNA binding, transcription factor activity	regulation of transcription, DNA-dependent
Ctsf	cathepsin F	56464	Ctsf	GO:5615(extracellular space); GO:5764(lysosome)	GO:16946(cathepsin F activity); GO:4197(cysteine-type endopeptidase activity); GO:8234(cysteine-type peptidase activity); GO:16787(hydrolase activity); GO:8233(peptidase activity)	GO:6508(proteolysis)
Cyp2j6	cytochrome P450, family 2, subfamily j, polypeptide 6	13110	Cyp2j6	GO:5783(endoplasmic reticulum); GO:5615(extracellular space); GO:16020(membrane); GO:5792(microsome)	GO:20037(heme binding); GO:5506(iron ion binding); GO:46872(metal ion binding); GO:4497(monooxygenase activity); GO:16491(oxidoreductase activity); GO:16712(oxidoreductase activity, acting on paired donors, with incorporation or reduction of molecular oxy	GO:6118(electron transport)
D630039A03Rik	RIKEN cDNA D630039A03 gene	242484		Unknown	Unknown	Unknown
Def8	differentially expressed in FDCP 8	23854	Def8	GO:8372(cellular component unknown)	GO:5554(molecular function unknown)	GO:7242(intracellular signaling cascade)
Dhodh	dihydroorotate dehydrogenase	56749	Dhodh	GO:16020(membrane); GO:5739(mitochondrion)	GO:4152(dihydroorotate dehydrogenase activity); GO:4158(dihydroorotate oxidase activity); GO:16491(oxidoreductase activity)	GO:6207('de novo' pyrimidine base biosynthesis); GO:6222(UMP biosynthesis); GO:6221(pyrimidine nucleotide biosynthesis)
Dnajb4	DnaJ (Hsp40) homolog, subfamily B, member 4	67035	Dnajb4	GO:8372(cellular component unknown)	GO:31072(heat shock protein binding); GO:51082(unfolded protein binding)	GO:6457(protein folding)
Dst	dystonin	13518	Dst	GO:16023(cytoplasmic membrane-bound vesicle); GO:5856(cytoskeleton); GO:30056(hemidesmosome)	GO:3779(actin binding); GO:5509(calcium ion binding); GO:5515(protein binding); GO:5198(structural molecule activity)	GO:7155(cell adhesion); GO:7050(cell cycle arrest); GO:8090(retrograde axon cargo transport)
Edg1	endothelial differentiation sphingolipid G-protein-coupled receptor 1	13609	Edg1	GO:16021(integral to membrane); GO:16020(membrane)	GO:4930(G-protein coupled receptor activity); GO:1619(lysosphingolipid and lysophosphatidic acid receptor activity); GO:4872(receptor activity); GO:1584(rhodopsin-like receptor activity); GO:4871(signal transducer activity)	GO:7186(G-protein coupled receptor protein signaling pathway); GO:7193(G-protein signaling, adenylate cyclase inhibiting pathway); GO:1525(angiogenesis); GO:30155(regulation of cell adhesion); GO:7165(signal transduction)
Ehbp1	EH domain binding protein 1	216565	Ehbp1	GO:8372(cellular component unknown)	GO:5515(protein binding)	Unknown
Eif2ak2	eukaryotic translation initiation factor 2-alpha kinase 2	19106	Prkr	GO:5622(intracellular)	GO:5524(ATP binding); GO:3723(RNA binding); GO:3725(double-stranded RNA binding); GO:16301(kinase activity); GO:166(nucleotide binding); GO:5515(protein binding); GO:4672(protein kinase activity); GO:4674(protein serine/threonine kinase activity); GO:1674	GO:6955(immune response); GO:6468(protein amino acid phosphorylation)
F11r	F11 receptor	16456	F11r	GO:16021(integral to membrane); GO:16020(membrane); GO:5923(tight junction)	GO:5515(protein binding)	GO:7155(cell adhesion); GO:30855(epithelial cell differentiation)
Fgd5	FYVE, RhoGEF and PH domain containing 5	232237	Fgd5	GO:5856(cytoskeleton)	GO:5085(guanyl-nucleotide exchange factor activity); GO:46872(metal ion binding); GO:8270(zinc ion binding)	Unknown
Fhl1	four and a half LIM domains 1	14199	Fhl1	GO:8372(cellular component unknown)	GO:20037(heme binding); GO:46872(metal ion binding); GO:8270(zinc ion binding)	GO:30154(cell differentiation); GO:7275(development)
Fkbp9	FK506 binding protein 9	27055	Fkbp9	GO:5783(endoplasmic reticulum); GO:5615(extracellular space)	GO:5509(calcium ion binding); GO:16853(isomerase activity); GO:3755(peptidyl-prolyl cis-trans isomerase activity)	GO:6457(protein folding)
Fnbp1l	formin-binding protein 1-like	214459		GO:0005856 (cytoskeleton); GO:0016020 (membrane)	GO:0008289 (lipid binding)	GO:0006897 (endocytosis)
Fstl1	follistatin-like 1	14314	Fstl1	GO:5615(extracellular space)	GO:5509(calcium ion binding); GO:8201(heparin binding)	Unknown
Gng11	guanine nucleotide binding protein (G protein), gamma 11	66066	Gng11	GO:5834(heterotrimeric G-protein complex); GO:16020(membrane)	GO:3924(GTPase activity); GO:4871(signal transducer activity)	GO:7186(G-protein coupled receptor protein signaling pathway); GO:7165(signal transduction)
Grb10	growth factor receptor bound protein 10	14783	Grb10	GO:5829(cytosol)	GO:5070(SH3/SH2 adaptor activity); GO:5515(protein binding); GO:4872(receptor activity)	GO:48009(insulin-like growth factor receptor signaling pathway); GO:7242(intracellular signaling cascade); GO:7165(signal transduction)
Gstk1	glutathione S-transferase kappa 1	76263	Gstk1	GO:5743(mitochondrial inner membrane); GO:5739(mitochondrion); GO:30288(periplasmic space (sensu Gram-negative Bacteria))	GO:4602(glutathione peroxidase activity); GO:4364(glutathione transferase activity); GO:15035(protein disulfide oxidoreductase activity); GO:16740(transferase activity)	GO:6749(glutathione metabolism); GO:6605(protein targeting)
Gucy1a3	guanylate cyclase 1, soluble, alpha 3	60596	Gucy1a3	GO:8372(cellular component unknown)	GO:4383(guanylate cyclase activity); GO:16829(lyase activity); GO:16849(phosphorus-oxygen lyase activity); GO:4872(receptor activity)	GO:6182(cGMP biosynthesis); GO:9190(cyclic nucleotide biosynthesis); GO:7242(intracellular signaling cascade)
H1f0	H1 histone family, member 0	14958	H1f0	GO:5694(chromosome); GO:786(nucleosome); GO:5634(nucleus)	GO:3677(DNA binding)	GO:7001(chromosome organization and biogenesis (sensu Eukaryota)); GO:7076(mitotic chromosome condensation); GO:6334(nucleosome assembly)
Ica1	islet cell autoantigen 1	15893	Ica1	GO:5795(Golgi stack); GO:5737(cytoplasm); GO:16020(membrane)	Unknown	GO:6836(neurotransmitter transport); GO:6810(transport)
Itm2a	integral membrane protein 2A	16431	Itm2a	GO:16021(integral to membrane); GO:16020(membrane)	Unknown	Unknown
Jam3	junction adhesion molecule 3	83964	Jam3	GO:9986(cell surface); GO:16021(integral to membrane); GO:16020(membrane)	GO:5515(protein binding)	GO:7155(cell adhesion)
Klf9	Kruppel-like factor 9	16601	Bteb1	GO:5634(nucleus)	GO:3677(DNA binding); GO:46872(metal ion binding); GO:3676(nucleic acid binding); GO:30528(transcription regulator activity); GO:8270(zinc ion binding)	GO:7566(embryo implantation); GO:50847(progesterone receptor signaling pathway); GO:45449(regulation of transcription); GO:6355(regulation of transcription, DNA-dependent); GO:6350(transcription)
Krt1-18	keratin complex 1, acidic, gene 18	16668	Krt1-18	GO:5882(intermediate filament); GO:5739(mitochondrion)	GO:5200(structural constituent of cytoskeleton); GO:5198(structural molecule activity)	GO:7010(cytoskeleton organization and biogenesis)
Ldhb	lactate dehydrogenase 2, B chain	16832	Ldh2	GO:5737(cytoplasm)	GO:4459(L-lactate dehydrogenase activity); GO:16491(oxidoreductase activity)	GO:19642(anaerobic glycolysis); GO:6096(glycolysis); GO:6100(tricarboxylic acid cycle intermediate metabolism)
Lphn2	latrophilin 2	269401	Gm632	GO:16021(integral to membrane); GO:16020(membrane)	GO:4930(G-protein coupled receptor activity); GO:16524(latrotoxin receptor activity); GO:4872(receptor activity); GO:4871(signal transducer activity)	GO:7186(G-protein coupled receptor protein signaling pathway); GO:7218(neuropeptide signaling pathway); GO:7165(signal transduction)
Lrch2	leucine-rich repeats and calponin homology (CH) domain containing 2	210297		GO:8372(cellular component unknown)	GO:0016740 : transferase activity
Maged2	melanoma antigen, family D, 2	80884	Maged2	GO:8372(cellular component unknown)	GO:5554(molecular function unknown)	GO:4(biological process unknown)
Map17/Pdzk1ip1	membrane-associated protein 17	67182	Map17	GO:5615(extracellular space); GO:16021(integral to membrane); GO:16020(membrane)	GO:5554(molecular function unknown)	GO:4(biological process unknown)
Mllt3	myeloid/lymphoid or mixed lineage-leukemia translocation to 3 homolog (Drosophila)	70122	Mllt3	GO:5634(nucleus)	GO:5554(molecular function unknown)	GO:9952(anterior/posterior pattern formation); GO:50875(cellular physiological process); GO:6355(regulation of transcription, DNA-dependent); GO:7379(segment specification)
Mllt4	myeloid/lymphoid or mixed lineage-leukemia translocation to 4 homolog (Drosophila)	17356	Mllt4	GO:5912(adherens junction); GO:30054(cell junction); GO:5737(cytoplasm); GO:16459(myosin)	GO:3774(motor activity); GO:5515(protein binding)	GO:7155(cell adhesion); GO:7218(neuropeptide signaling pathway); GO:7165(signal transduction)
Ndn	necdin	17984	Ndn	GO:0005634(nucleus)|	GO:0006355(regulation of transcription, DNA-dependent)|GO:0006874(calcium ion homeostasis)|GO:0007585(respiratory gaseous exchange)	GO:0001558(regulation of cell growth)|GO:0003677(DNA binding)|GO:0005515(protein binding)|
Ndrg2	N-myc downstream regulated gene 2	29811	Ndrg2	GO:8372(cellular component unknown)	Unknown	GO:30154(cell differentiation)
Nphp1	nephronophthisis 1 (juvenile) homolog (human)	53885	Nphp1	GO:8372(cellular component unknown)	GO:0005515 : protein binding	Unknown
Nrip1	nuclear receptor interacting protein 1	268903	Nrip1	GO:5634(nucleus)	GO:5515(protein binding); GO:4872(receptor activity); GO:3714(transcription corepressor activity)	GO:122(negative regulation of transcription from RNA polymerase II promoter); GO:6355(regulation of transcription, DNA-dependent); GO:6350(transcription)
Oact2	O-acyltransferase (membrane bound) domain containing 2	67216	Oact2	GO:16021(integral to membrane)	GO:8415(acyltransferase activity); GO:16740(transferase activity)	Unknown
Olfr1396	olfactory receptor 1396	258334	Olfr1396	GO:16021(integral to membrane)	GO:4984(olfactory receptor activity); GO:4872(receptor activity)	GO:7186(G-protein coupled receptor protein signaling pathway); GO:7608(sensory perception of smell)
Ormdl3	ORM1-like 3 (S. cerevisiae)	66612	Ormdl3	GO:5783(endoplasmic reticulum); GO:16021(integral to membrane); GO:16020(membrane)	Unknown	Unknown
Palld	palladin, cytoskeletal associated protein (RIKEN cDNA 2410003B16)	72333	2410003B16Rik	cytoplasm,actin filament, integral to membrane, membrane,nucleus	ATP binding, muscle alpha-actinin binding VEGFR activity	cytoskeleton organization and biogenesis, protein amino acid phosphorylation
Pbx1	pre B-cell leukemia transcription factor 1	18514	Pbx1	GO:5737(cytoplasm); GO:5634(nucleus); GO:5667(transcription factor complex)	GO:3677(DNA binding); GO:5515(protein binding); GO:46982(protein heterodimerization activity); GO:3700(transcription factor activity)	GO:6700(C21-steroid hormone biosynthesis); GO:30325(adrenal gland development); GO:30154(cell differentiation); GO:9887(organ morphogenesis); GO:8284(positive regulation of cell proliferation); GO:45944(positive regulation of transcription from RNA polyme
Phyh	phytanoyl-CoA hydroxylase	16922	Phyh	GO:5777(peroxisome)	GO:31418(L-ascorbic acid binding); GO:3824(catalytic activity); GO:5506(iron ion binding); GO:16491(oxidoreductase activity); GO:48244(phytanoyl-CoA dioxygenase activity); GO:5515(protein binding)	GO:1561(fatty acid alpha-oxidation)
Prdm16	PR domain containing 16	70673	Prdm16	GO:5634(nucleus)	GO:3677(DNA binding); GO:46872(metal ion binding); GO:8270(zinc ion binding)	GO:6355(regulation of transcription, DNA-dependent); GO:6350(transcription)
Prnp	prion protein	19122	Prnp	GO:5794(Golgi apparatus); GO:5783(endoplasmic reticulum); GO:45121(lipid raft); GO:16020(membrane); GO:5886(plasma membrane)	GO:5507(copper ion binding)	GO:6878(copper ion homeostasis); GO:6139(nucleobase, nucleoside, nucleotide and nucleic acid metabolism); GO:6979(response to oxidative stress)
Procr	protein C receptor, endothelial	19124	Procr	GO:5813(centrosome); GO:16021(integral to membrane); GO:16020(membrane)	GO:8022(protein C-terminus binding); GO:4872(receptor activity)	GO:7596(blood coagulation); GO:50819(negative regulation of coagulation)
Ptgs1	prostaglandin-endoperoxide synthase 1	19224	Ptgs1	GO:5737(cytoplasm); GO:5615(extracellular space); GO:16020(membrane); GO:5792(microsome); GO:5634(NOT nucleus)	GO:5506(iron ion binding); GO:46872(metal ion binding); GO:16491(oxidoreductase activity); GO:16702(oxidoreductase activity, acting on single donors with incorporation of molecular oxygen, incorporation of two atoms of oxygen); GO:4601(peroxidase activity	GO:8217(blood pressure regulation); GO:6633(fatty acid biosynthesis); GO:8610(lipid biosynthesis); GO:1516(prostaglandin biosynthesis)
Ptplad2	protein tyrosine phosphatase-like A domain containing 2 (RIKEN cDNA 4933428I03)	66775	4933428I03Rik	GO:16021(integral to membrane)	Unknown	Unknown
Pygl	liver glycogen phosphorylase	110095	Pygl	GO:8372(cellular component unknown)	GO:3824(catalytic activity); GO:8184(glycogen phosphorylase activity); GO:4645(phosphorylase activity); GO:30170(pyridoxal phosphate binding); GO:16740(transferase activity); GO:16757(transferase activity, transferring glycosyl groups)	GO:5975(carbohydrate metabolism); GO:5977(glycogen metabolism)
Rbbp9	retinoblastoma binding protein 9	26450	Rbbp9	GO:8372(cellular component unknown); GO:5634(nucleus)	GO:5554(molecular function unknown)	GO:4(biological process unknown)
Rbp1	retinol binding protein 1, cellular	19659	Rbp1	GO:8372(cellular component unknown)	GO:5488(binding); GO:8289(lipid binding); GO:16918(retinal binding); GO:5501(retinoid binding); GO:19841(retinol binding)	GO:42572(retinol metabolism); GO:6810(transport)
Rec8L1	REC8-like 1 (yeast)	56739	Rec8L1	GO:800(lateral element); GO:228(nuclear chromosome); GO:5634(nucleus); GO:795(synaptonemal complex)	GO:5515(protein binding)	GO:7001(chromosome organization and biogenesis (sensu Eukaryota)); GO:7126(meiosis)
Robo4	roundabout homolog 4 (Drosophila)	74144	Robo4	GO:9897(external side of plasma membrane); GO:16021(integral to membrane)	GO:5515(protein binding); GO:4872(receptor activity)	GO:1525(angiogenesis); GO:30154(cell differentiation); GO:7275(development); GO:30336(negative regulation of cell migration)
Ryk	receptor-like tyrosine kinase	20187	Ryk	GO:16021(integral to membrane); GO:16020(membrane); GO:5624(membrane fraction); GO:5886(plasma membrane)	GO:5524(ATP binding); GO:42813(Wnt receptor activity); GO:17147(Wnt-protein binding); GO:16301(kinase activity); GO:166(nucleotide binding); GO:5515(protein binding); GO:4672(protein kinase activity); GO:4713(NOT protein-tyrosine kinase activity); GO:4872	GO:7409(axonogenesis); GO:6468(protein amino acid phosphorylation); GO:48705(skeletal morphogenesis)
Sdc2	syndecan 2	15529	Sdc2	GO:16021(integral to membrane); GO:16020(membrane)	GO:8092(cytoskeletal protein binding)	Unknown
Sgce	sarcoglycan, epsilon	20392	Sgce	GO:5856(cytoskeleton); GO:5615(extracellular space); GO:16021(integral to membrane); GO:5887(integral to plasma membrane); GO:16020(membrane); GO:16012(sarcoglycan complex)	GO:5509(calcium ion binding); GO:5515(protein binding)	Unknown
Smarca2	SWI/SNF related, matrix associated, actin dependent regulator of chromatin, subfamily a, member 2	67155	Smarca2	GO:16514(SWI/SNF complex); GO:5634(nucleus)	GO:5524(ATP binding); GO:3677(DNA binding); GO:4386(helicase activity); GO:16787(hydrolase activity); GO:3676(nucleic acid binding); GO:166(nucleotide binding); GO:5515(protein binding)	GO:6281(DNA repair); GO:16568(chromatin modification); GO:6325(establishment and/or maintenance of chromatin architecture); GO:8285(negative regulation of cell proliferation); GO:6334(nucleosome assembly); GO:6355(regulation of transcription, DNA-dependen
Soat1	sterol O-acyltransferase 1	20652	Soat1	GO:5783(endoplasmic reticulum); GO:16021(integral to membrane); GO:16020(membrane)	GO:8415(acyltransferase activity); GO:4772(sterol O-acyltransferase activity); GO:16740(transferase activity)	GO:8203(cholesterol metabolism); GO:6629(lipid metabolism); GO:8202(steroid metabolism)
Spire1	spire homolog 1 (Drosophila)	68166	Spire1	GO:5794(Golgi apparatus)	GO:5554(molecular function unknown)	GO:48193(Golgi vesicle transport)
Srgap2	SLIT-ROBO Rho GTPase activating protein 2	14270	Srgap2	GO:5743(mitochondrial inner membrane)	GO:5096(GTPase activator activity); GO:5515(protein binding)	GO:51301(cell division)
St3gal1	ST3 beta-galactoside alpha-2,3-sialyltransferase 1	20442	gb|NM_009177	GO:5795(Golgi stack); GO:5615(extracellular space); GO:30173(integral to Golgi membrane); GO:16021(integral to membrane); GO:16020(membrane)	GO:3836(beta-galactoside alpha-2,3-sialyltransferase activity); GO:8373(sialyltransferase activity); GO:16740(transferase activity); GO:16757(transferase activity, transferring glycosyl groups)	GO:6486(protein amino acid glycosylation)
Stat4	signal transducer and activator of transcription 4	20849	Stat4	GO:5634(nucleus)	GO:3677(DNA binding); GO:5509(calcium ion binding); GO:4871(signal transducer activity); GO:3700(transcription factor activity)	GO:8283(cell proliferation); GO:19221(cytokine and chemokine mediated signaling pathway); GO:7242(intracellular signaling cascade); GO:6355(regulation of transcription, DNA-dependent); GO:7165(signal transduction); GO:6350(transcription)
Tgm2	transglutaminase 2, C polypeptide	21817	Tgm2	GO:5737(cytoplasm)	GO:8415(acyltransferase activity); GO:5509(calcium ion binding); GO:4197(cysteine-type endopeptidase activity); GO:46872(metal ion binding); GO:3810(protein-glutamine gamma-glutamyltransferase activity); GO:16740(transferase activity)	GO:7200(G-protein signaling, coupled to IP3 second messenger (phospholipase C activating)); GO:18149(peptide cross-linking); GO:6508(proteolysis)
Tgtp	T-cell specific GTPase	21822	Tgtp	GO:8372(cellular component unknown)	GO:5525(GTP binding)	Unknown
Trpc6	transient receptor potential cation channel, subfamily C, member 6	22068	Trpc6	GO:16021(integral to membrane); GO:5887(integral to plasma membrane); GO:16020(membrane)	GO:5262(calcium channel activity); GO:5509(calcium ion binding); GO:5261(cation channel activity); GO:5216(ion channel activity); GO:4872(receptor activity); GO:15279(store-operated calcium channel activity)	GO:6816(calcium ion transport); GO:6812(cation transport); GO:7204(elevation of cytosolic calcium ion concentration); GO:6811(ion transport); GO:6810(transport)
Tsc22d3	TSC22 domain family 3	14605	Dsip1	GO:8372(cellular component unknown)	GO:3700(transcription factor activity)	GO:6916(anti-apoptosis); GO:6355(regulation of transcription, DNA-dependent)
Tspan32	pan hematopoietic expression	27027	Phemx	GO:16021(integral to membrane); GO:5622(intracellular); GO:16020(membrane)	GO:5554(molecular function unknown)	GO:4(biological process unknown)
Tuft1	tuftelin 1	22156	Tuft1	GO:8372(cellular component unknown)	Unknown	GO:1503(ossification)
Txnip	thioredoxin interacting protein	56338	Txnip	GO:5737(cytoplasm)	GO:4857(enzyme inhibitor activity); GO:5515(protein binding)	GO:6979(response to oxidative stress)
Usp39	ubiquitin specific protease 39	28035	Usp39	GO:8372(cellular component unknown)	GO:4197(cysteine-type endopeptidase activity); GO:3676(nucleic acid binding); GO:8233(peptidase activity); GO:4221(ubiquitin thiolesterase activity); GO:8270(zinc ion binding)	GO:6511(ubiquitin-dependent protein catabolism)
Wfdc2	WAP four-disulfide core domain 2	67701	Wfdc2	GO:5615(extracellular space)	GO:4866(endopeptidase inhibitor activity); GO:4867(serine-type endopeptidase inhibitor activity)	Unknown
Zfp467	zinc finger protein 467	68910	Zfp467	GO:5634(nucleus)	GO:3677(DNA binding); GO:46872(metal ion binding); GO:5515(protein binding); GO:8270(zinc ion binding)	GO:45449(regulation of transcription)
Zmym6	zinc finger, MYM-type 6 (RIKEN cDNA 9330177P20)	100177	9330177P20Rik	GO:8372(cellular component unknown)	GO:5554(molecular function unknown)	GO:4(biological process unknown)
